# Supplementary material for: Anti-Neuroinflammatory Potential of a Nectandra angustifolia (Laurel Amarillo) Ethanolic Extract
Source: MDPI journal article supplement (doi:10.3390/antiox12020232), 2023-01-19
Supplement: s1 [file s1]

## Figure S1

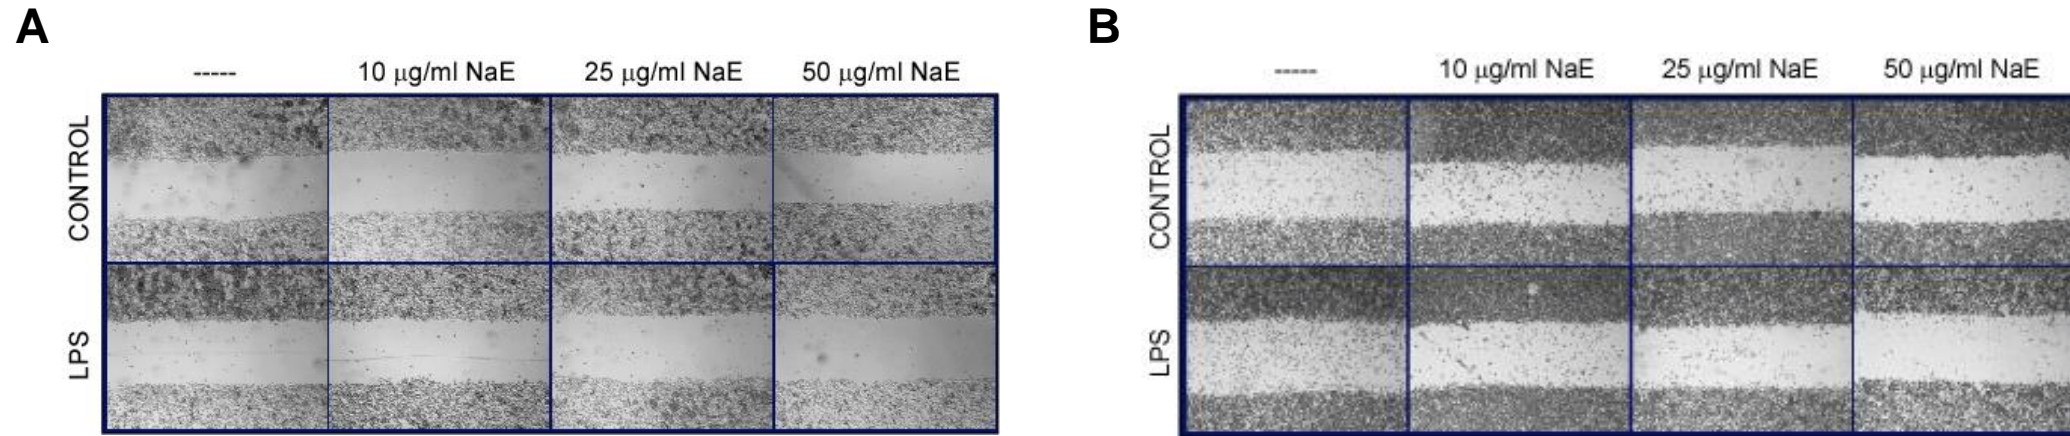

**Figure S1. Effect of NaE extract on BV2 microglia functions.** BV2 cells were pretreated for 60 min at 37 °C with the indicated doses of NaE, and then stimulated or not with 0.1  $\mu\text{g/ml}$  of LPS. Representative images showing: (A) Scratch at time 0; (B) Cell migration at 3 h. Magnification, 40 $\times$ .

# Figure S2

(i)

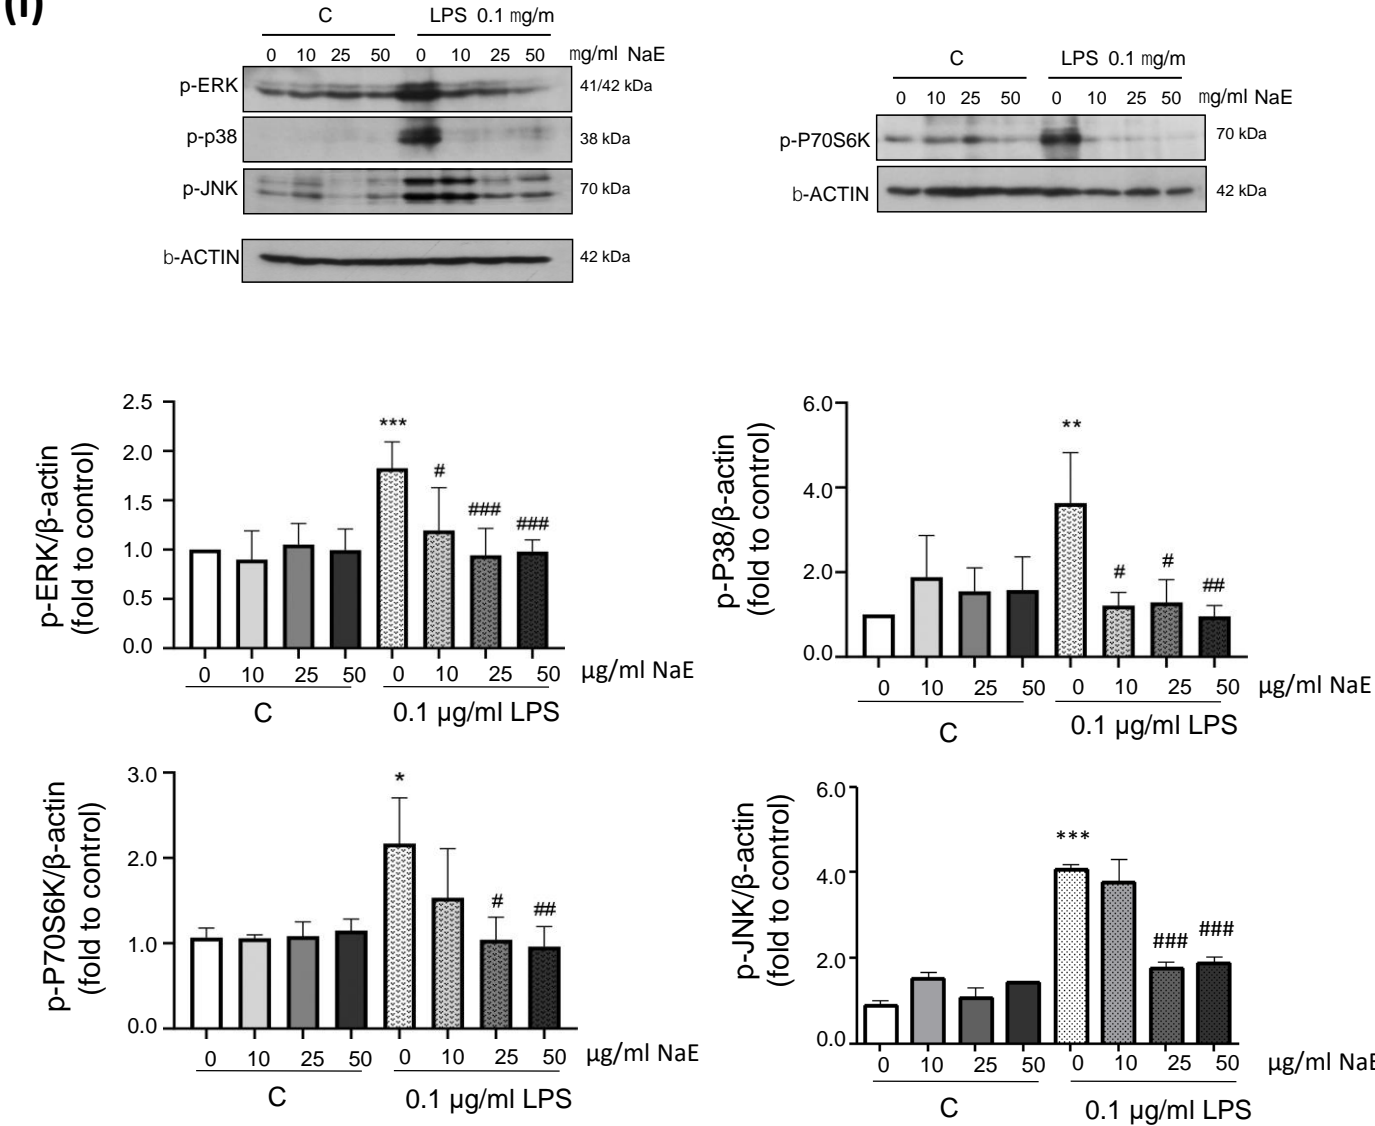

(ii)

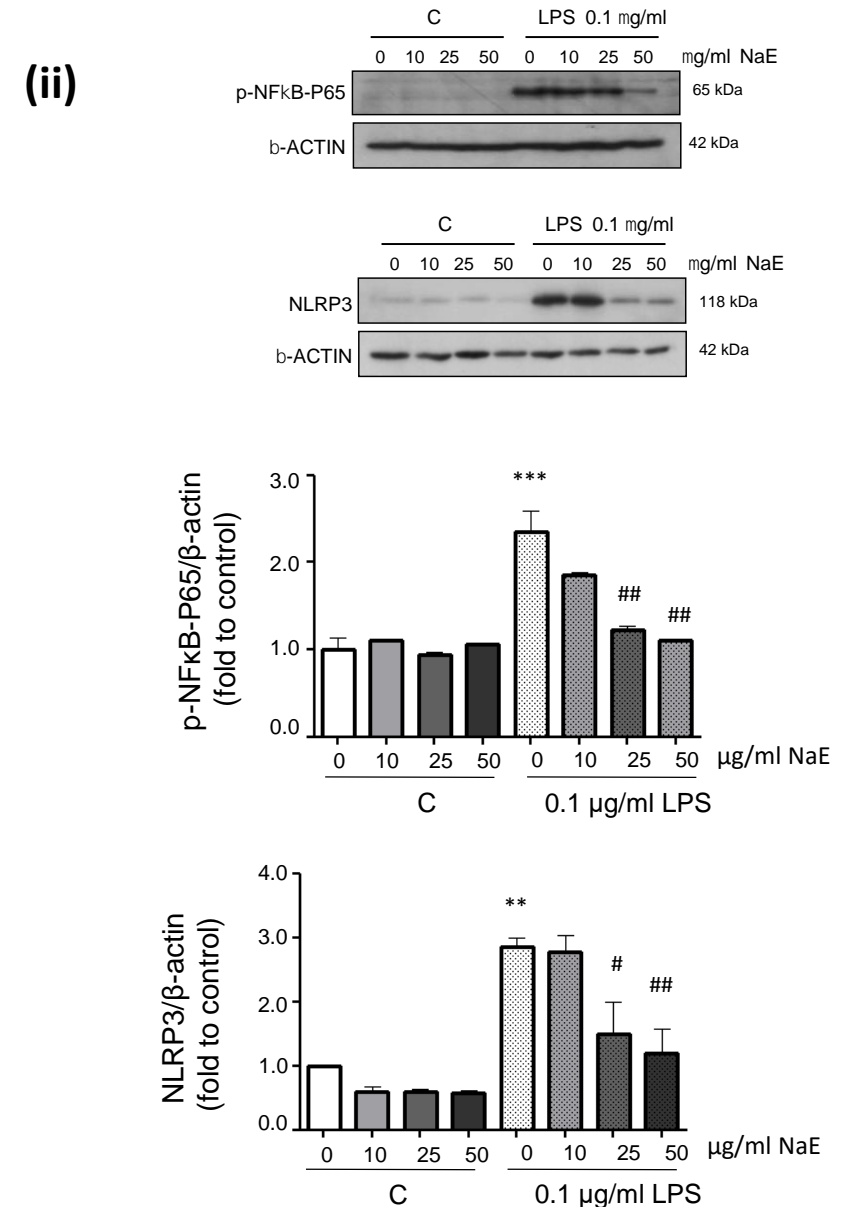

**Figure S2. NaE treatment modulates BV2 microglial cells activation: Quantification.** BV2 cells were pretreated for 60 min with the indicated doses of NaE. After 30 min (i) or 24 h (ii) of stimulation with 0.1 μg/ml of LPS, p-ERK, p-P38, p-JNK, p-NFκB-P65 and NLRP3 expression was identified in cell lysates by Western blot. Quantification graphs of the Western blots are shown with fold over the control in each condition (\*\*\*p<0.001, \*\*p<0.01, \*p<0.05 vs control; ###p<0.001, ##p<0.01 and #p<0.05 vs LPS)

Figure S3

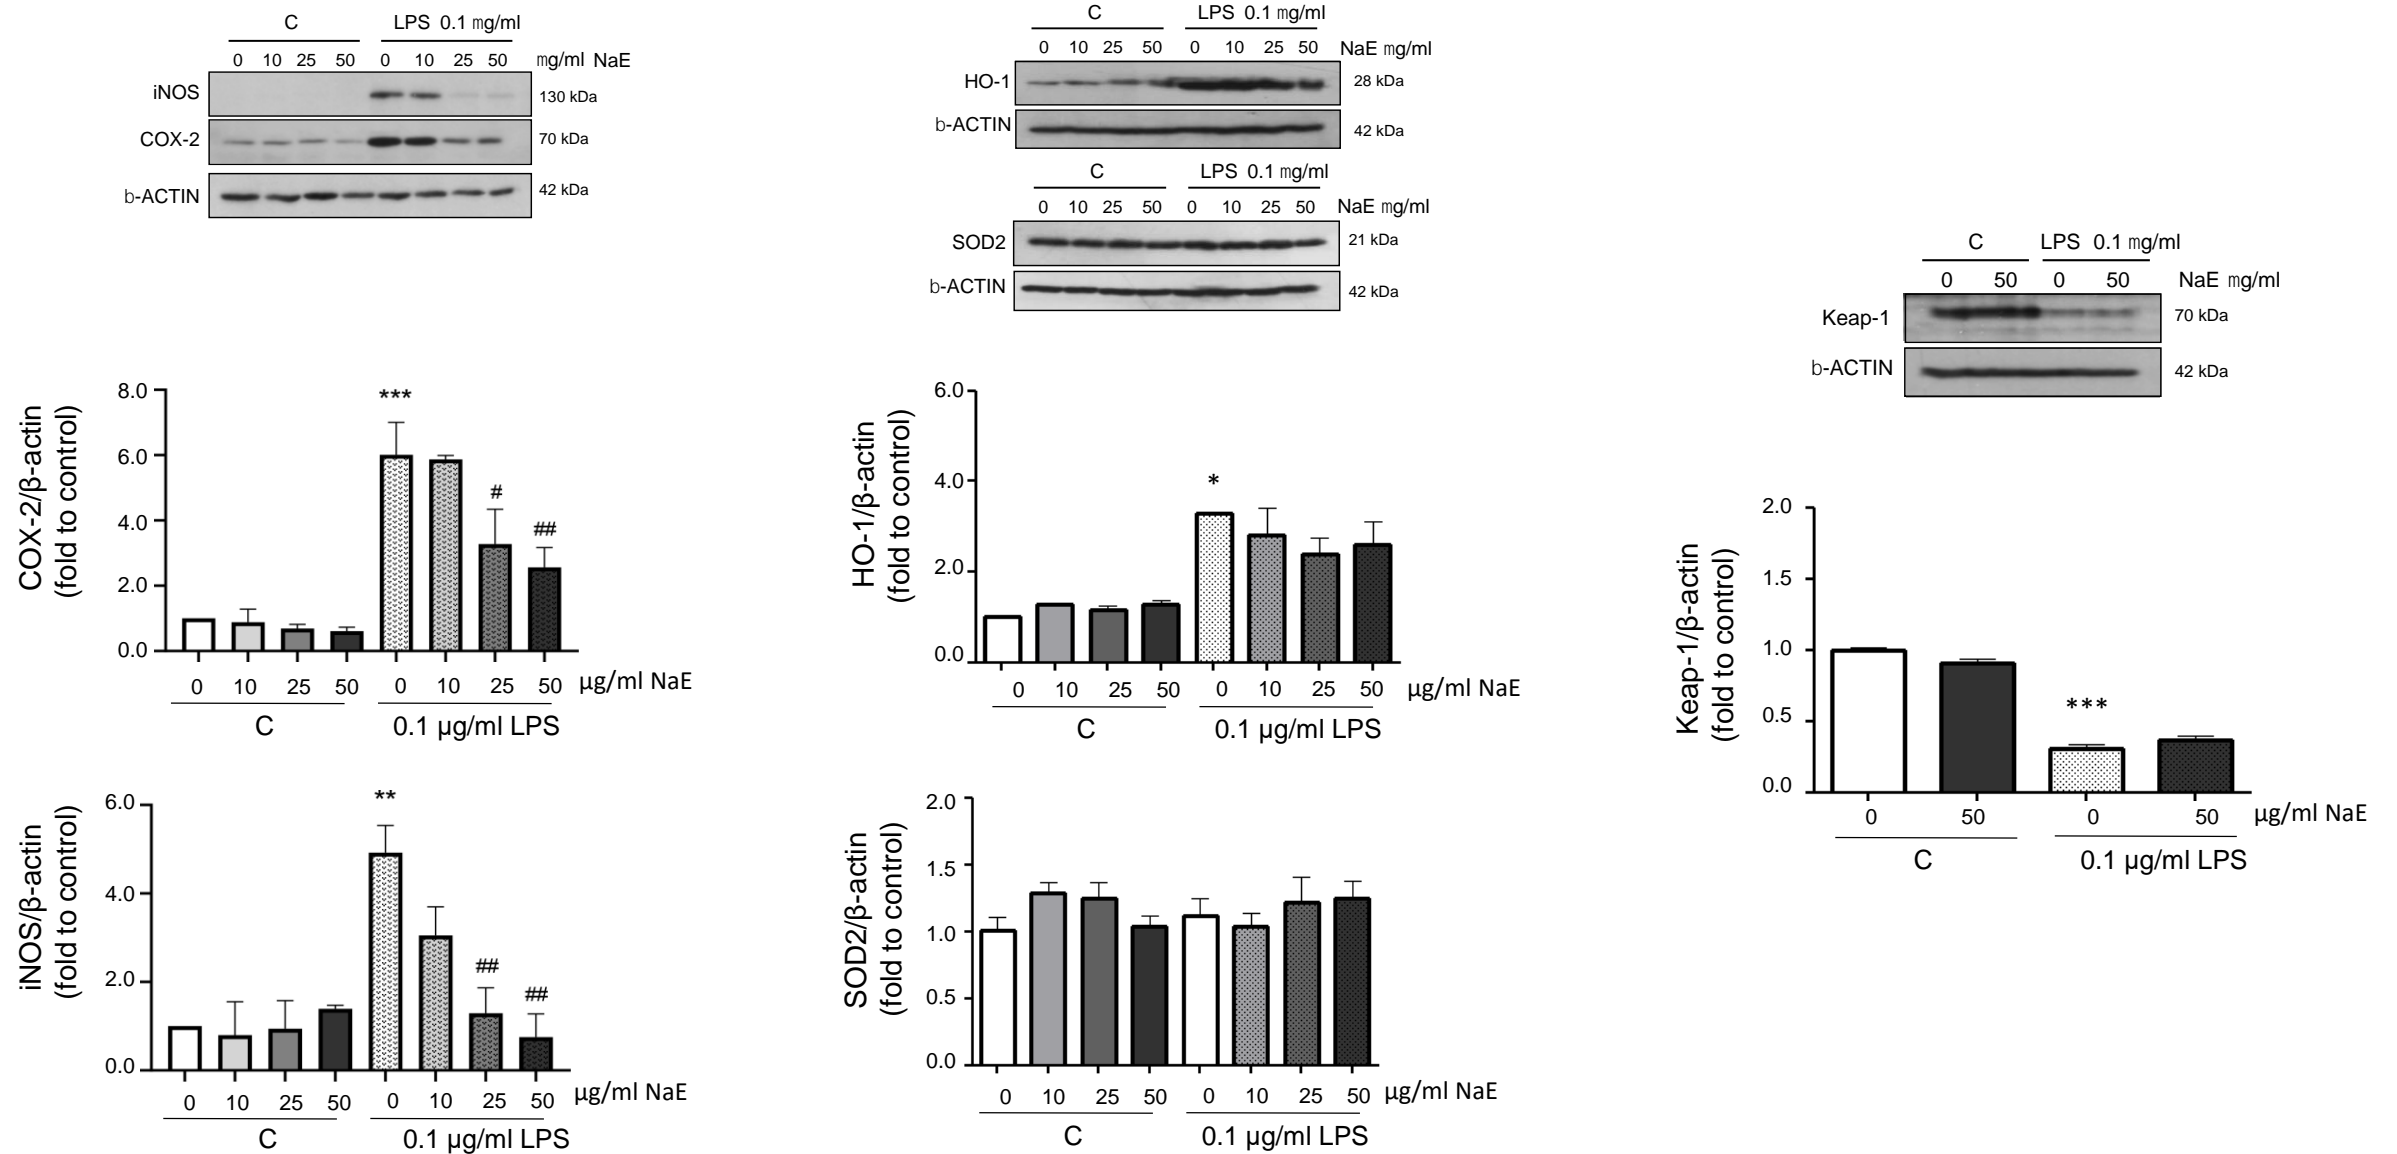

**Figure S3. NaE treatment modulates BV2 microglial cells activation: Quantification.** BV2 cells were pretreated for 60 min with the indicated doses of NaE. After 24 h of stimulation with 0.1  $\mu$ g/ml of LPS, COX-2, iNOS, HO-1, SOD2 and Keap-1 expression was identified in cell lysates by Western blot. Quantification graphs of the Western blots are shown with fold over the control in each condition (\*\*\*p<0.001, \*\*p<0.01, \*p<0.05 vs control; ##p<0.01 and #p<0.05 vs LPS)

**Figure S4**

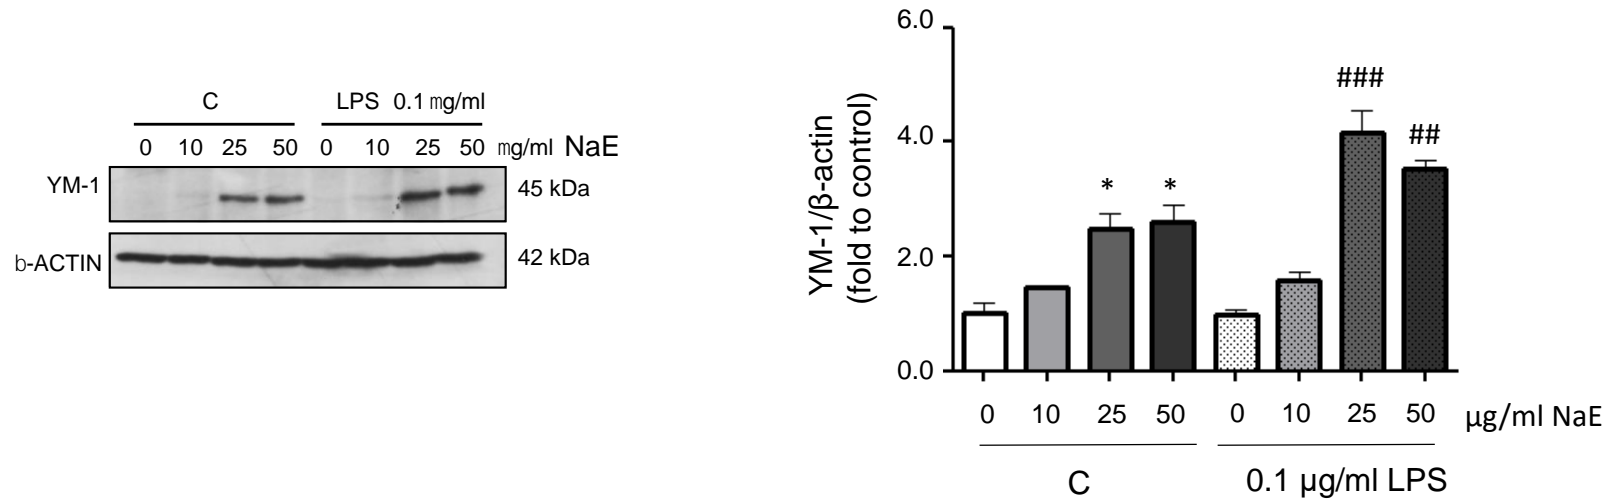

**Figure S4. NaE treatment modulates BV2 microglial cells activation: Quantification.** BV2 cells were pretreated for 60 min with the indicated doses of NaE. After 24 h of stimulation with 0.1 μg/ml of LPS, YM-1 expression was identified in cell lysates by Western blot. Quantification graphs of the Western blots are shown with fold over the control in each condition (\*p<0.05 vs control; ###p<0.001 and ##p<0.01 vs LPS)

## Table S1

**Table S1.** The concentration of the selected cytokines in the culture supernatants of BV2 cells pretreated for 60 min at 37 °C with the indicated doses of NaE, and then stimulated with 0.1 µg/ml of LPS. Data presented as means ± SD (n = 3–5)

|               | CONTROL        |                |                | LPS          |                |                |
|---------------|----------------|----------------|----------------|--------------|----------------|----------------|
|               | 0              | NaE 25         | NaE 50         | 0            | NaE 25         | NaE 50         |
| TNFα (ng/ml)  | 0,325±0,110    | 0,346±0,170    | 0,342±0,110    | 75,713±1,960 | 17,562±6,870   | 7,070±1,830    |
| IL-6 (ng/ml)  | 0,012±0,005    | 0,010±0,005    | 0,017±0,006    | 12,988±2,700 | 6,017±2,230    | 1,971±1,350    |
| IL-1β (pg/ml) | 10,060±3,027   | 12,690±1,707   | 15,978±2,784   | 75,880±3,719 | 10,811±1,349   | 14,212±1,609   |
| IL-10 (pg/ml) | 393,300±34,690 | 263,300±22,610 | 398,900±56,220 | 8,000±2,000  | 230,000±17,000 | 283,300±69,440 |
